# Supplementary material
Source: publisher figshare collection journal article supplement (https://sage.figshare.com/ndownloader/files/23391881)
Supplement: Supplementary file 1 [file 23391881]

## Data Sources and Searches

To identify articles, we searched MEDLINE, the Cochrane Collaboration Central Register of Controlled Trials, and the citation lists of systematic reviews. There were no language restrictions. The initial search, including publications before November 2008, was used to identify studies for the individual patient data meta-analysis, and identified 31 eligible studies. Individual patient data was received from 29 of these trials. An updated search was performed to include trials published after November 2008 and before December 31, 2015, which identified an additional 13 trials. Of these 13 trials, individual patient data was received from 10, for a total of 44 studies, including 39 with individual patient data available.

## Study Selection

Two reviewers applied inclusion criteria for potentially eligible articles separately, with disagreements about study inclusion resolved by consensus. Randomized controlled trials were eligible for analysis if they included at least 1 group receiving acupuncture needling and 1 group receiving either sham (placebo) acupuncture or no-acupuncture control. The RCTs must have accrued patients with 1 of 4 indications—nonspecific back or neck pain, shoulder pain, chronic headache, or osteoarthritis—with the additional criterion that the current episode of pain must be of at least 4 weeks duration for musculoskeletal disorders. There was no restriction on the type of outcome measure, although we specified that the primary endpoint must be measured more than 4 weeks after the initial acupuncture treatment.

It has been demonstrated that unconcealed allocation is the most important source of bias in RCTs, and, as such, we included only those RCTs in which allocation concealment was determined unambiguously to be adequate. Where necessary, we contacted authors for further information concerning the exact logistics of the randomization process. We excluded RCTs if there was any ambiguity about allocation concealment.

## Data Extraction and Quality Assessment

The principal investigators of eligible studies were contacted and asked to provide raw data from the RCT. To ensure data accuracy, all results reported in the RCT publication, including baseline characteristics and outcome data, were then replicated. Reviewers assessed the quality of blinding for eligible RCTs with sham acupuncture control. The RCTs were graded as having a low likelihood of bias if either the adequacy of blinding was checked by direct questioning of patients (e.g., by use of a credibility questionnaire) and no important differences were found between groups, or the blinding method (e.g., the Streitberger and Kleinhenz sham device<sup>1</sup>) had previously been validated as able to maintain blinding. Randomized controlled trials with a high likelihood of bias from unblinding were excluded from the meta-analysis of acupuncture vs sham; a sensitivity analysis included only RCTs with a low risk of bias.

## Data Synthesis and Analysis

Each RCT was reanalyzed by analysis of covariance with the standardized principal endpoint (scores divided by pooled standard deviation) as the dependent variable, and the baseline measure of the principal endpoint and variables used to stratify randomization as covariates. This approach has been shown to have the greatest statistical power for RCTs with baseline and follow-up measures. The effect size for acupuncture from each RCT was then entered into a meta-analysis using the *metan* command in Stata software (version 15; Stata Corp): the meta-analytic statistics were created by weighting each coefficient by the reciprocal of the variance, summing, and dividing by the sum of the weights. Meta-analyses were conducted separately for comparisons of acupuncture with sham and no acupuncture control, and within each pain type. We prespecified that the hypothesis test would be based on the fixed effects analysis because this constitutes a valid test of the null hypothesis of no treatment effect.

**Supplementary Table 1.** Characteristics of included studies

| Indication (n=44)                                       | Pain Type                                                                                               | Control Group                                                                                                                                                                                                                                                                           | Primary Outcome Measure                                                                                                                                                                                                                                                                                                                                                                                                         | Time Point                                                                                                                                                                                                                                                   |
|---------------------------------------------------------|---------------------------------------------------------------------------------------------------------|-----------------------------------------------------------------------------------------------------------------------------------------------------------------------------------------------------------------------------------------------------------------------------------------|---------------------------------------------------------------------------------------------------------------------------------------------------------------------------------------------------------------------------------------------------------------------------------------------------------------------------------------------------------------------------------------------------------------------------------|--------------------------------------------------------------------------------------------------------------------------------------------------------------------------------------------------------------------------------------------------------------|
| Chronic headache (n=9)                                  | Migraine (n=3) <sup>2-4</sup> , tension-type headache (n=3) <sup>5-7</sup> , both <sup>8-10</sup> (n=3) | Sham control (n=5) <sup>2-4,6,7</sup><br><br>No acupuncture control (n=7); ancillary care (n=2) <sup>5,8</sup> ; usual care (n=4) <sup>4,7,9,10</sup> ; guideline care (n=1) <sup>2</sup>                                                                                               | Severity score (n=2) <sup>5,10</sup> ; days with headache (n=3) <sup>6,7,9</sup> ; days with migraine (n=2) <sup>2,3</sup> ; days with moderate-to-severe pain (n=1) <sup>4</sup> ; Migraine Disability Assessment (MIDAS) (n=1) <sup>8</sup>                                                                                                                                                                                   | 1 mo (n=1) <sup>5</sup><br>2 mo (n=1) <sup>8</sup><br>3 mo (n=3) <sup>4,7,9</sup><br>4 mo (n=1) <sup>3</sup><br>6 mo (n=2) <sup>2,6</sup><br>12 mo (n=1) <sup>10</sup>                                                                                       |
| Nonspecific musculoskeletal pain (back and neck) (n=18) | Back (n=12) <sup>11-22</sup> ; neck (n=6) <sup>23-28</sup>                                              | Sham control (n=10) <sup>11,12,14,15,17-19,23,26,27</sup> ;<br><br>No acupuncture control (n=12);<br><br>Ancillary care (n=3) <sup>16,19,21</sup> ; usual care (n=7) <sup>11,14,20,22,24,25,28 109</sup> ; non-specific advice (n=1) <sup>13</sup> ; guideline care (n=1) <sup>15</sup> | VAS (n=7) <sup>11,12,18,19,23,26,27</sup> ; Roland Morris Disability Questionnaire (n=3) <sup>13,14,17</sup> ; Northwick Park Neck Pain Questionnaire (n=2) <sup>24,25</sup> ; SF-36 Bodily pain (n=2) <sup>20,21</sup> ; Hannover Functional Questionnaire (n=1) <sup>22</sup> ; Von Korff pain score (n=1) <sup>15</sup> ; Oswestry Disability Index (n=1) <sup>16</sup> ; Neck Pain and Disability Scale (n=1) <sup>28</sup> | 1 mo (n=4) <sup>18,23,26,27</sup><br>2 mo (n=3) <sup>11,13,14</sup><br>3 mo (n=5) <sup>17,19,22,25,28</sup><br>4 mo (n=1) <sup>21</sup><br>6 mo (n=2) <sup>15,16</sup><br>8 mo (n=1) <sup>12</sup><br>12 mo (n=1) <sup>24</sup><br>24 mo (n=1) <sup>20</sup> |
| Osteoarthritis (n=13)                                   |                                                                                                         | Sham control (n=10) <sup>29-38</sup><br><br>No acupuncture control (n=10); ancillary care (n=3) <sup>31,33,34</sup> ; usual care (n=5) <sup>32,35,38-40</sup> ; nonspecific advice (n=2) <sup>29,41</sup>                                                                               | WOMAC (n=5) <sup>30,33,38-40</sup> ; WOMAC Pain subscore (n=4) <sup>29,31,34,36</sup> ; Oxford Knee score questionnaire (n=1) <sup>41</sup> ; VAS <sup>37</sup> (n=1); knee pain (0-10) (n=1) <sup>32</sup> ; Joint-specific Multidimensional Assessment of Pain (n=1) <sup>35</sup>                                                                                                                                            | 1 mo (n=1) <sup>37</sup><br>2 mo (n=3) <sup>33,38,41</sup><br>3 mo (n=6) <sup>30,32,35,36,39,40</sup><br>6 mo (n=3) <sup>29,31,34</sup>                                                                                                                      |
| Shoulder pain (n=4)                                     |                                                                                                         | Sham control (n=4) <sup>42-45</sup><br><br>No-acupuncture control (n=1); ancillary care (n=1) <sup>44</sup>                                                                                                                                                                             | Constant-Murley score (n=2) <sup>43,45</sup> ; VAS (n=2) <sup>42,44</sup>                                                                                                                                                                                                                                                                                                                                                       | 1 mo (n=2) <sup>43,45</sup><br>6 mo (n=2) <sup>42,44</sup>                                                                                                                                                                                                   |

## References

1. Streitberger K, Kleinhenz J. Introducing a placebo needle into acupuncture research. *Lancet*. 1998;352(9125):364-365.
2. Diener HC, Kronfeld K, Boewing G, et al. Efficacy of acupuncture for the prophylaxis of migraine: a multicentre randomised controlled clinical trial. *Lancet Neurol*. 2006;5(4):310-316.
3. Li Y, Zheng H, Witt CM, et al. Acupuncture for migraine prophylaxis: a randomized controlled trial. *Cmaj*. 2012;184(4):401-410.
4. Linde K, Streng A, Jurgens S, et al. Acupuncture for patients with migraine: a randomized controlled trial. *Jama*. 2005;293(17):2118-2125.
5. Coeytaux RR, Kaufman JS, Kaptchuk TJ, et al. A randomized, controlled trial of acupuncture for chronic daily headache. *Headache*. 2005;45(9):1113-1123.
6. Endres HG, Bowing G, Diener HC, et al. Acupuncture for tension-type headache: a multicentre, sham-controlled, patient-and observer-blinded, randomised trial. *J Headache Pain*. 2007;8(5):306-314.
7. Melchart D, Streng A, Hoppe A, et al. Acupuncture in patients with tension-type headache: randomised controlled trial. *Bmj*. 2005;331(7513):376-382.
8. Ferro EC, Biagini AP, da Silva IE, Silva ML, Silva JR. The combined effect of acupuncture and Tanacetum parthenium on quality of life in women with headache: randomised study. *Acupunct Med*. 2012;30(4):252-257.
9. Jena S, Witt CM, Brinkhaus B, Wegscheider K, Willich SN. Acupuncture in patients with headache. *Cephalalgia*. 2008;28(9):969-979.
10. Vickers AJ, Rees RW, Zollman CE, et al. Acupuncture for chronic headache in primary care: large, pragmatic, randomised trial. *Bmj*. 2004;328(7442):744.
11. Brinkhaus B, Witt CM, Jena S, et al. Acupuncture in patients with chronic low back pain: a randomized controlled trial. *Arch Intern Med*. 2006;166(4):450-457.
12. Carlsson CP, Sjolund BH. Acupuncture for chronic low back pain: a randomized placebo-controlled study with long-term follow-up. *Clin J Pain*. 2001;17(4):296-305.
13. Cherkin DC, Eisenberg D, Sherman KJ, et al. Randomized trial comparing traditional Chinese medical acupuncture, therapeutic massage, and self-care education for chronic low back pain. *Arch Intern Med*. 2001;161(8):1081-1088.
14. Cherkin DC, Sherman KJ, Avins AL, et al. A randomized trial comparing acupuncture, simulated acupuncture, and usual care for chronic low back pain. *Arch Intern Med*. 2009;169(9):858-866.
15. Haake M, Muller HH, Schade-Brittinger C, et al. German Acupuncture Trials (GERAC) for chronic low back pain: randomized, multicenter, blinded, parallel-group trial with 3 groups. *Arch Intern Med*. 2007;167(17):1892-1898.
16. Hunter RF, McDonough SM, Bradbury I, et al. Exercise and Auricular Acupuncture for Chronic Low-back Pain: A Feasibility Randomized-controlled Trial. *Clin J Pain*. 2012;28(3):259-267.
17. Kennedy S, Baxter GD, Kerr DP, Bradbury I, Park J, McDonough SM. Acupuncture for acute non-specific low back pain: a pilot randomised non-penetrating sham controlled trial. *Complement Ther Med*. 2008;16(3):139-146.
18. Kerr DP, Walsh DM, Baxter D. Acupuncture in the management of chronic low back pain: a blinded randomized controlled trial. *Clin J Pain*. 2003;19(6):364-370.
19. Molsberger AF, Mau J, Pawelec DB, Winkler J. Does acupuncture improve the orthopedic management of chronic low back pain--a randomized, blinded, controlled trial with 3 months follow up. *Pain*. 2002;99(3):579-587.
20. Thomas KJ, MacPherson H, Thorpe L, et al. Randomised controlled trial of a short course of traditional acupuncture compared with usual care for persistent non-specific low back pain. *Bmj*. 2006;333(7569):623.
21. Weiss J, Quante S, Xue F, Muche R, Reuss-Borst M. Effectiveness and acceptance of acupuncture in patients with chronic low back pain: results of a prospective, randomized, controlled trial. *J Altern Complement Med*. 2013;19(12):935-941.
22. Witt CM, Jena S, Selim D, et al. Pragmatic Randomized Trial Evaluating the Clinical and Economic Effectiveness of Acupuncture for Chronic Low Back Pain. *Am J Epidemiol*. 2006;164(5):487-496.
23. Irnich D, Behrens N, Molzen H, et al. Randomised trial of acupuncture compared with conventional massage and "sham" laser acupuncture for treatment of chronic neck pain. *Bmj*. 2001;322(7302):1574-1578.
24. MacPherson H, Tilbrook H, Richmond S, et al. Alexander Technique Lessons or Acupuncture Sessions for Persons With Chronic Neck Pain: A Randomized Trial. *Ann Intern Med*. 2015;163(9):653-662.

25. Salter GC, Roman M, Bland MJ, MacPherson H. Acupuncture for chronic neck pain: a pilot for a randomised controlled trial. *BMC Musculoskelet Disord*. 2006;7:99.
26. Vas J, Perea-Milla E, Mendez C, et al. Efficacy and safety of acupuncture for chronic uncomplicated neck pain: a randomised controlled study. *Pain*. 2006;126(1-3):245-255.
27. White P, Lewith G, Prescott P, Conway J. Acupuncture versus placebo for the treatment of chronic mechanical neck pain: a randomized, controlled trial. *Ann Intern Med*. 2004;141(12):911-919.
28. Witt CM, Jena S, Brinkhaus B, Liecker B, Wegscheider K, Willich SN. Acupuncture for patients with chronic neck pain. *Pain*. 2006.
29. Berman BM, Lao L, Langenberg P, Lee WL, Gilpin AM, Hochberg MC. Effectiveness of acupuncture as adjunctive therapy in osteoarthritis of the knee: a randomized, controlled trial. *Ann Intern Med*. 2004;141(12):901-910.
30. Chen LX, Mao JJ, Fernandes S, et al. Integrating acupuncture with exercise-based physical therapy for knee osteoarthritis: a randomized controlled trial. *Journal of clinical rheumatology : practical reports on rheumatic & musculoskeletal diseases*. 2013;19(6):308-316.
31. Foster NE, Thomas E, Barlas P, et al. Acupuncture as an adjunct to exercise based physiotherapy for osteoarthritis of the knee: randomised controlled trial. *Bmj*. 2007;335(7617):436.
32. Hinman RS, McCrory P, Pirodda M, et al. Acupuncture for chronic knee pain: a randomized clinical trial. *Jama*. 2014;312(13):1313-1322.
33. Mavrommatis CI, Argyra E, Vadalouka A, Vasilakos DG. Acupuncture as an adjunctive therapy to pharmacological treatment in patients with chronic pain due to osteoarthritis of the knee: a 3-armed, randomized, placebo-controlled trial. *Pain*. 2012;153(8):1720-1726.
34. Scharf HP, Mansmann U, Streitberger K, et al. Acupuncture and knee osteoarthritis: a three-armed randomized trial. *Ann Intern Med*. 2006;145(1):12-20.
35. Suarez-Almazor ME, Looney C, Liu Y, et al. A randomized controlled trial of acupuncture for osteoarthritis of the knee: effects of patient-provider communication. *Arthritis Care Res (Hoboken)*. 2010;62(9):1229-1236.
36. Vas J, Mendez C, Perea-Milla E, et al. Acupuncture as a complementary therapy to the pharmacological treatment of osteoarthritis of the knee: randomised controlled trial. *Bmj*. 2004;329(7476):1216.
37. White P, Bishop FL, Prescott P, Scott C, Little P, Lewith G. Practice, practitioner, or placebo? A multifactorial, mixed-methods randomized controlled trial of acupuncture. *Pain*. 2012;153(2):455-462.
38. Witt C, Brinkhaus B, Jena S, et al. Acupuncture in patients with osteoarthritis of the knee: a randomised trial. *Lancet*. 2005;366(9480):136-143.
39. Lansdown H, Howard K, Brealey S, MacPherson H. Acupuncture for pain and osteoarthritis of the knee: a pilot study for an open parallel-arm randomised controlled trial. *BMC Musculoskelet Disord*. 2009;10:130.
40. Witt CM, Jena S, Brinkhaus B, Liecker B, Wegscheider K, Willich SN. Acupuncture in patients with osteoarthritis of the knee or hip: a randomized, controlled trial with an additional nonrandomized arm. *Arthritis Rheum*. 2006;54(11):3485-3493.
41. Williamson L, Wyatt MR, Yein K, Melton JT. Severe knee osteoarthritis: a randomized controlled trial of acupuncture, physiotherapy (supervised exercise) and standard management for patients awaiting knee replacement. *Rheumatology (Oxford)*. 2007;46(9):1445-1449.
42. Guerra de Hoyos JA, Andres Martin Mdel C, Bassas y Baena de Leon E, et al. Randomised trial of long term effect of acupuncture for shoulder pain. *Pain*. 2004;112(3):289-298.
43. Kleinhenz J, Streitberger K, Windeler J, Gussbacher A, Mavridis G, Martin E. Randomised clinical trial comparing the effects of acupuncture and a newly designed placebo needle in rotator cuff tendinitis. *Pain*. 1999;83(2):235-241.
44. Molsberger AF, Schneider T, Gotthardt H, Drabik A. German Randomized Acupuncture Trial for chronic shoulder pain (GRASP) - a pragmatic, controlled, patient-blinded, multi-centre trial in an outpatient care environment. *Pain*. 2010;151(1):146-154.
45. Vas J, Ortega C, Olmo V, et al. Single-point acupuncture and physiotherapy for the treatment of painful shoulder: a multicentre randomized controlled trial. *Rheumatology (Oxford)*. 2008;47(6):887-893.

**Supplementary Figure 1.** Preferred Reporting Items for Systematic Reviews and Meta-Analyses (PRISMA) flow diagram.

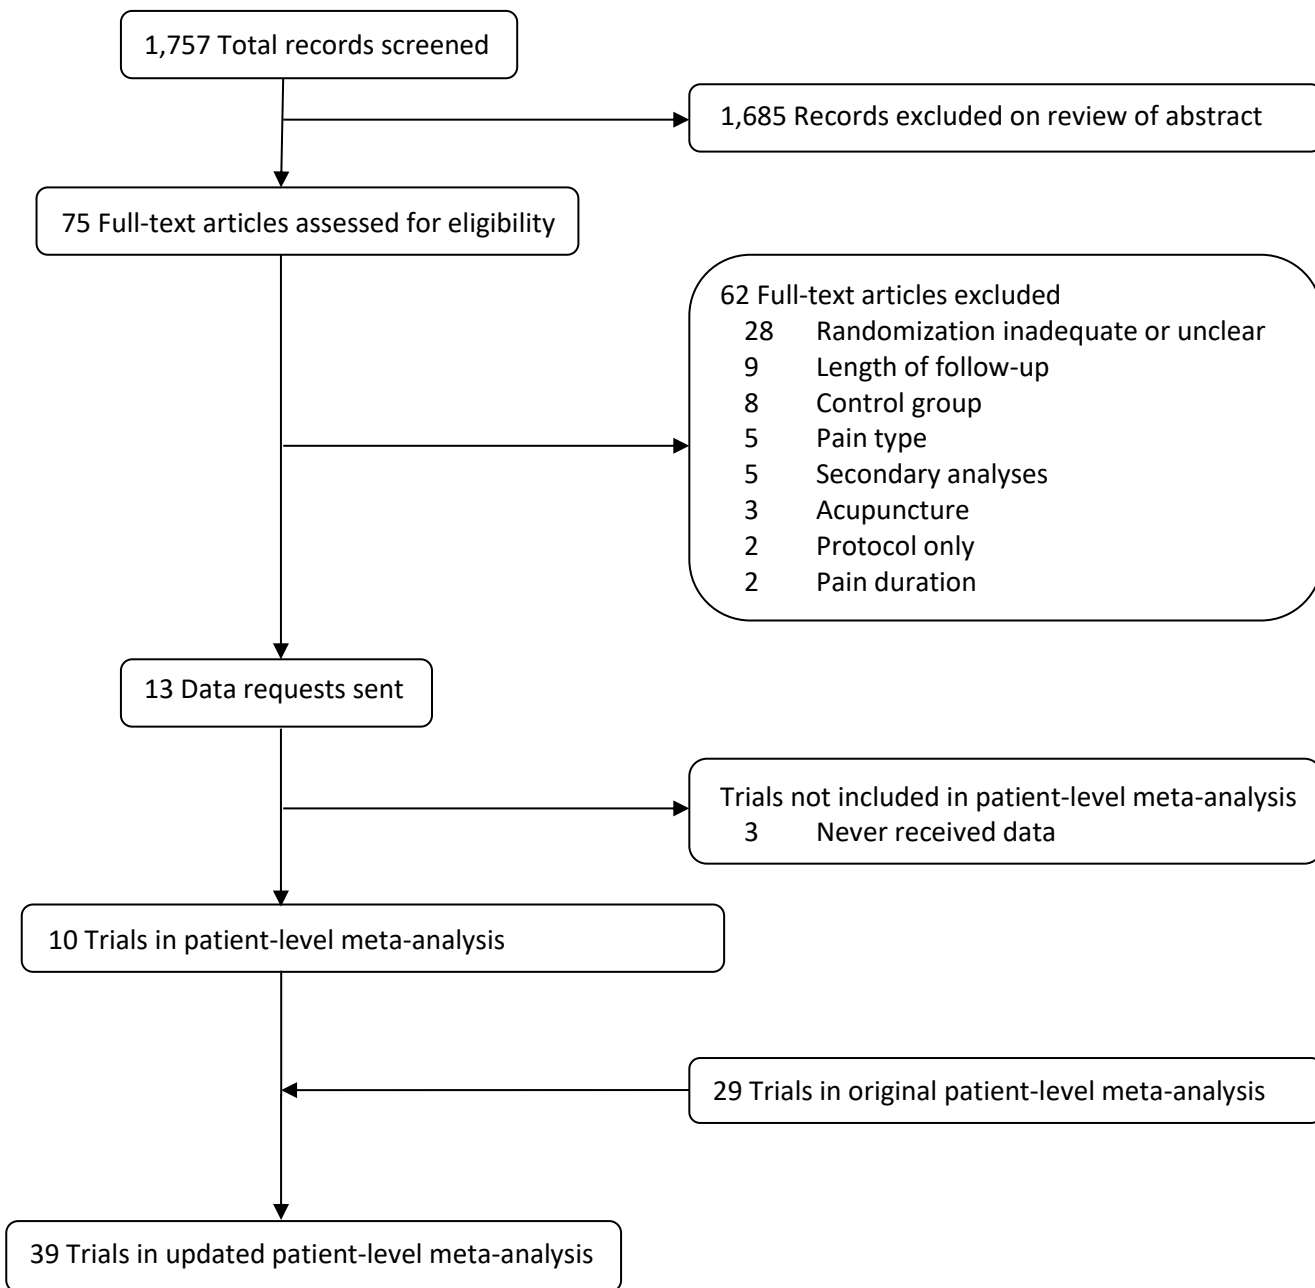

**Supplementary Table 2. PRISMA-IPD Checklist of items to include when reporting a systematic review and meta-analysis of individual participant data (IPD)**

| PRISMA-IPD<br>Section/topic | Item<br>No | Checklist item                                                                                                                                                                                                                                                                                                                                                                                                                                                                                                          | Reported on page |
|-----------------------------|------------|-------------------------------------------------------------------------------------------------------------------------------------------------------------------------------------------------------------------------------------------------------------------------------------------------------------------------------------------------------------------------------------------------------------------------------------------------------------------------------------------------------------------------|------------------|
| Title                       |            |                                                                                                                                                                                                                                                                                                                                                                                                                                                                                                                         |                  |
| Title                       | 1          | Identify the report as a systematic review and meta-analysis of individual participant data.                                                                                                                                                                                                                                                                                                                                                                                                                            | Manuscript 1, 3  |
| Abstract                    |            |                                                                                                                                                                                                                                                                                                                                                                                                                                                                                                                         |                  |
| Structured<br>summary       | 2          | Provide a structured summary including as applicable:                                                                                                                                                                                                                                                                                                                                                                                                                                                                   | Manuscript 1, 2  |
|                             |            | <b>Background:</b> state research question and main objectives, with information on participants, interventions, comparators and outcomes.                                                                                                                                                                                                                                                                                                                                                                              |                  |
|                             |            | <b>Methods:</b> report eligibility criteria; data sources including dates of last bibliographic search or elicitation, noting that IPD were sought; methods of assessing risk of bias.                                                                                                                                                                                                                                                                                                                                  |                  |
|                             |            | <b>Results:</b> provide number and type of studies and participants identified and number (%) obtained; summary effect estimates for main outcomes (benefits and harms) with confidence intervals and measures of statistical heterogeneity. Describe the direction and size of summary effects in terms meaningful to those who would put findings into practice.                                                                                                                                                      |                  |
|                             |            | <b>Discussion:</b> state main strengths and limitations of the evidence, general interpretation of the results and any important implications.                                                                                                                                                                                                                                                                                                                                                                          |                  |
|                             |            | <b>Other:</b> report primary funding source, registration number and registry name for the systematic review and IPD meta-analysis.                                                                                                                                                                                                                                                                                                                                                                                     |                  |
| Introduction                |            |                                                                                                                                                                                                                                                                                                                                                                                                                                                                                                                         |                  |
| Rationale                   | 3          | Describe the rationale for the review in the context of what is already known.                                                                                                                                                                                                                                                                                                                                                                                                                                          | Manuscript 3     |
| Objectives                  | 4          | Provide an explicit statement of the questions being addressed with reference, as applicable, to participants, interventions, comparisons, outcomes and study design (PICOS). Include any hypotheses that relate to particular types of participant-level subgroups.                                                                                                                                                                                                                                                    | Manuscript 3     |
| Methods                     |            |                                                                                                                                                                                                                                                                                                                                                                                                                                                                                                                         |                  |
| Protocol and registration   | 5          | Indicate if a protocol exists and where it can be accessed. If available, provide registration information including registration number and registry name. Provide publication details, if applicable.                                                                                                                                                                                                                                                                                                                 | Manuscript 4     |
| Eligibility criteria        | 6          | Specify inclusion and exclusion criteria including those relating to participants, interventions, comparisons, outcomes, study design and characteristics (e.g. years when conducted, required minimum follow-up). Note whether these were applied at the study or individual level i.e. whether eligible participants were included (and ineligible participants excluded) from a study that included a wider population than specified by the review inclusion criteria. The rationale for criteria should be stated. | Manuscript 4     |

|                                                |    |                                                                                                                                                                                                                                                                                                                                                                                                                                         |                              |
|------------------------------------------------|----|-----------------------------------------------------------------------------------------------------------------------------------------------------------------------------------------------------------------------------------------------------------------------------------------------------------------------------------------------------------------------------------------------------------------------------------------|------------------------------|
| Identifying studies - information sources      | 7  | Describe all methods of identifying published and unpublished studies including, as applicable: which bibliographic databases were searched with dates of coverage; details of any hand searching including of conference proceedings; use of study registers and agency or company databases; contact with the original research team and experts in the field; open adverts and surveys. Give the date of last search or elicitation. | Supplement 1                 |
| Identifying studies - search                   | 8  | Present the full electronic search strategy for at least one database, including any limits used, such that it could be repeated.                                                                                                                                                                                                                                                                                                       | Supplement 1                 |
| Study selection processes                      | 9  | State the process for determining which studies were eligible for inclusion.                                                                                                                                                                                                                                                                                                                                                            | Manuscript 4, Supplement 1   |
| Data collection processes                      | 10 | Describe how IPD were requested, collected and managed, including any processes for querying and confirming data with investigators. If IPD were not sought from any eligible study, the reason for this should be stated (for each such study).                                                                                                                                                                                        | Supplement 1                 |
|                                                |    | If applicable, describe how any studies for which IPD were not available were dealt with. This should include whether, how and what aggregate data were sought or extracted from study reports and publications (such as extracting data independently in duplicate) and any processes for obtaining and confirming these data with investigators.                                                                                      |                              |
| Data items                                     | 11 | Describe how the information and variables to be collected were chosen. List and define all study level and participant level data that were sought, including baseline and follow-up information. If applicable, describe methods of standardising or translating variables within the IPD datasets to ensure common scales or measurements across studies.                                                                            | Manuscript 4                 |
| IPD integrity                                  | A1 | Describe what aspects of IPD were subject to data checking (such as sequence generation, data consistency and completeness, baseline imbalance) and how this was done.                                                                                                                                                                                                                                                                  | Supplement 1                 |
| Risk of bias assessment in individual studies. | 12 | Describe methods used to assess risk of bias in the individual studies and whether this was applied separately for each outcome. If applicable, describe how findings of IPD checking were used to inform the assessment. Report if and how risk of bias assessment was used in any data synthesis.                                                                                                                                     | Supplement 1                 |
| Specification of outcomes and effect measures  | 13 | State all treatment comparisons of interests. State all outcomes addressed and define them in detail. State whether they were pre-specified for the review and, if applicable, whether they were primary/main or secondary/additional outcomes. Give the principal measures of effect (such as risk ratio, hazard ratio, difference in means) used for each outcome.                                                                    | Manuscript 4                 |
| Synthesis methods                              | 14 | Describe the meta-analysis methods used to synthesise IPD. Specify any statistical methods and models used. Issues should include (but are not restricted to): <ul style="list-style-type: none"> <li>• Use of a one-stage or two-stage approach.</li> <li>• How effect estimates were generated separately within each study and combined across studies (where applicable).</li> </ul>                                                | Manuscript 4-5, Supplement 1 |

|                                     |    |                                                                                                                                                                                                                                                                                                                                                                                                                                                                                                                                                                                                                                                                                   |                                 |
|-------------------------------------|----|-----------------------------------------------------------------------------------------------------------------------------------------------------------------------------------------------------------------------------------------------------------------------------------------------------------------------------------------------------------------------------------------------------------------------------------------------------------------------------------------------------------------------------------------------------------------------------------------------------------------------------------------------------------------------------------|---------------------------------|
|                                     |    | <ul style="list-style-type: none"> <li>• Specification of one-stage models (where applicable) including how clustering of patients within studies was accounted for.</li> <li>• Use of fixed or random effects models and any other model assumptions, such as proportional hazards.</li> <li>• How (summary) survival curves were generated (where applicable).</li> <li>• Methods for quantifying statistical heterogeneity (such as <math>I^2</math> and <math>\tau^2</math>).</li> <li>• How studies providing IPD and not providing IPD were analysed together (where applicable).</li> <li>• How missing data within the IPD were dealt with (where applicable).</li> </ul> |                                 |
| Exploration of variation in effects | A2 | If applicable, describe any methods used to explore variation in effects by study or participant level characteristics (such as estimation of interactions between effect and covariates). State all participant-level characteristics that were analysed as potential effect modifiers, and whether these were pre-specified.                                                                                                                                                                                                                                                                                                                                                    | N/A                             |
| Risk of bias across studies         | 15 | Specify any assessment of risk of bias relating to the accumulated body of evidence, including any pertaining to not obtaining IPD for particular studies, outcomes or other variables.                                                                                                                                                                                                                                                                                                                                                                                                                                                                                           | Manuscript 4, Supplement 1      |
| Additional analyses                 | 16 | Describe methods of any additional analyses, including sensitivity analyses. State which of these were pre-specified.                                                                                                                                                                                                                                                                                                                                                                                                                                                                                                                                                             | Manuscript 5                    |
| <b>Results</b>                      |    |                                                                                                                                                                                                                                                                                                                                                                                                                                                                                                                                                                                                                                                                                   |                                 |
| Study selection and IPD obtained    | 17 | Give numbers of studies screened, assessed for eligibility, and included in the systematic review with reasons for exclusions at each stage. Indicate the number of studies and participants for which IPD were sought and for which IPD were obtained. For those studies where IPD were not available, give the numbers of studies and participants for which aggregate data were available. Report reasons for non-availability of IPD. Include a flow diagram.                                                                                                                                                                                                                 | Manuscript 4, Supplement 1      |
| Study characteristics               | 18 | For each study, present information on key study and participant characteristics (such as description of interventions, numbers of participants, demographic data, unavailability of outcomes, funding source, and if applicable duration of follow-up). Provide (main) citations for each study. Where applicable, also report similar study characteristics for any studies not providing IPD.                                                                                                                                                                                                                                                                                  | Supplementary Table 1           |
| IPD integrity                       | A3 | Report any important issues identified in checking IPD or state that there were none.                                                                                                                                                                                                                                                                                                                                                                                                                                                                                                                                                                                             | Supplement 1                    |
| Risk of bias within studies         | 19 | Present data on risk of bias assessments. If applicable, describe whether data checking led to the up-weighting or down-weighting of these assessments. Consider how any potential bias impacts on the robustness of meta-analysis conclusions.                                                                                                                                                                                                                                                                                                                                                                                                                                   | Manuscript 4, Supplement 1      |
| Results of individual studies       | 20 | For each comparison and for each main outcome (benefit or harm), for each individual study report the number of eligible participants for which data were obtained and show simple summary data for each intervention group (including, where applicable, the number of events), effect estimates and confidence intervals. These may be tabulated or included on a forest plot.                                                                                                                                                                                                                                                                                                  | Figures 3 and 5                 |
| Results of syntheses                | 21 | Present summary effects for each meta-analysis undertaken, including confidence intervals and measures of statistical heterogeneity. State whether the analysis was pre-specified, and report the numbers of studies and participants and, where applicable, the number of events on which it is based.                                                                                                                                                                                                                                                                                                                                                                           | Manuscript 5-6, Figures 3 and 5 |



|                             |    |                                                                                                                                                                                                                                                                                                                                         |                            |
|-----------------------------|----|-----------------------------------------------------------------------------------------------------------------------------------------------------------------------------------------------------------------------------------------------------------------------------------------------------------------------------------------|----------------------------|
|                             |    | When exploring variation in effects due to patient or study characteristics, present summary interaction estimates for each characteristic examined, including confidence intervals and measures of statistical heterogeneity. State whether the analysis was pre-specified. State whether any interaction is consistent across trials. |                            |
|                             |    | Provide a description of the direction and size of effect in terms meaningful to those who would put findings into practice.                                                                                                                                                                                                            |                            |
| Risk of bias across studies | 22 | Present results of any assessment of risk of bias relating to the accumulated body of evidence, including any pertaining to the availability and representativeness of available studies, outcomes or other variables.                                                                                                                  | Manuscript 4, Supplement 1 |
| Additional analyses         | 23 | Give results of any additional analyses (e.g. sensitivity analyses). If applicable, this should also include any analyses that incorporate aggregate data for studies that do not have IPD. If applicable, summarise the main meta-analysis results following the inclusion or exclusion of studies for which IPD were not available.   | Manuscript 6               |
| <b>Discussion</b>           |    |                                                                                                                                                                                                                                                                                                                                         |                            |
| Summary of evidence         | 24 | Summarise the main findings, including the strength of evidence for each main outcome.                                                                                                                                                                                                                                                  | Manuscript 6               |
| Strengths and limitations   | 25 | Discuss any important strengths and limitations of the evidence including the benefits of access to IPD and any limitations arising from IPD that were not available.                                                                                                                                                                   | Manuscript 7               |
| Conclusions                 | 26 | Provide a general interpretation of the findings in the context of other evidence.                                                                                                                                                                                                                                                      | Manuscript 7               |
| Implications                | A4 | Consider relevance to key groups (such as policy makers, service providers and service users). Consider implications for future research.                                                                                                                                                                                               | Manuscript 7               |
| <b>Funding</b>              |    |                                                                                                                                                                                                                                                                                                                                         |                            |
| Funding                     | 27 | Describe sources of funding and other support (such as supply of IPD), and the role in the systematic review of those providing such support.                                                                                                                                                                                           | Manuscript 7               |
